# Supplementary material for: Mechanochemical transformation of spent ternary lithium-ion battery electrode material to perovskite oxides for catalytic CO oxidation
Source: Royal Society of Chemistry journal article supplement (doi:10.1039/d4ta02968b), 2024-01-01
Supplement: d4ta02968b1.pdf [file d4ta02968b1.pdf]

## Supplementary Information

# Mechanochemical transformation of spent ternary lithium-ion battery electrode material to perovskite oxides for catalytic CO oxidation

*Guangze Nie<sup>a, §</sup>, Xiangqian Du<sup>b, §</sup>, Hongchao Yu<sup>b</sup>, Weiyi Fan<sup>b</sup>, Min Pan<sup>b</sup>, Fei Gao<sup>b</sup>, Feng Wu<sup>b</sup>, Yunchuan Hong<sup>b</sup>, Hongjian Tang<sup>a</sup>, Zhihao Zhou<sup>a</sup>, Guoshu Deng<sup>a</sup>, Lin Li<sup>a</sup>, Zhenkun Sun<sup>a, \*</sup>, and Lunbo Duan<sup>a, \*</sup>*

<sup>a</sup> Key Laboratory of Energy Thermal Conversion and Control, Ministry of Education, School of Energy and Environment, Southeast University, Nanjing, 210096, China.

<sup>b</sup> MCC Huatian Engineering and Technology Corporation, Nanjing, 210019, China

<sup>§</sup> These authors contributed equally to this study.

\* Corresponding authors: zhenkun\_sun@seu.edu.cn, duanlunbo@seu.edu.cn

## Contents

|                                                                                                                                                                                                                                                                            |     |
|----------------------------------------------------------------------------------------------------------------------------------------------------------------------------------------------------------------------------------------------------------------------------|-----|
| <b>1 EXPERIMENT SECTION</b>                                                                                                                                                                                                                                                | S5  |
| <b>1.1 Catalyst preparation</b>                                                                                                                                                                                                                                            | S5  |
| <b>1.2 Material characterization</b>                                                                                                                                                                                                                                       | S7  |
| <b>1.3 Catalytic performance evaluation</b>                                                                                                                                                                                                                                | S10 |
| <b>1.4 Economic and environmental analysis</b>                                                                                                                                                                                                                             | S12 |
| <b>2 SUPPORTING FIGURES AND TABLES</b>                                                                                                                                                                                                                                     | S15 |
| <b>Fig.S1</b> XRD pattern of LNCM-32-800                                                                                                                                                                                                                                   | S15 |
| <b>Fig.S2</b> XRD pattern of LNCM-32-500                                                                                                                                                                                                                                   | S16 |
| <b>Fig.S3</b> (a) TEM images of LNCM-16-600, (b) LNCM-16-800, (c) LNCM-16-1000, (d) HRTEM images of LNCM-16-800, and (e) LNCM-16-1000.                                                                                                                                     | S17 |
| <b>Fig.S4</b> XPS survey over catalysts LNCM-16-600, LNCM-16-800 and LNCM-16-1000.                                                                                                                                                                                         | S18 |
| <b>Fig.S5</b> Normalized CO conversion rate ( $r_{\text{norm}}$ ) versus temperature over catalysts LNCM-16-600, LNCM-16-800 and LNCM-16-1000                                                                                                                              | S19 |
| <b>Fig.S6</b> (a) Light-off curves during CO oxidation over catalyst LNCM-16-1000 under different WHSVs; (b) dependence of CO reaction rate on partial pressure of O <sub>2</sub> over catalyst LNCM-16-1000 catalyst (WHSV = 45,000 ml g <sup>-1</sup> h <sup>-1</sup> ). | S20 |
| <b>Fig.S7</b> Light-off curves of CO oxidation for LNCM-16-400, LNCM-32-500 and LNCM-16-600.                                                                                                                                                                               | S22 |

|                                                                                                                                                                                                                                       |     |
|---------------------------------------------------------------------------------------------------------------------------------------------------------------------------------------------------------------------------------------|-----|
| <b>Fig.S8</b> Normalized CO conversion rate ( $r_{\text{norm}}$ ) versus temperature over catalysts LNCMO-16-600, LNCM-16-600 and LNCMO-32-600.                                                                                       | S23 |
| <b>Fig.S9</b> Arrhenius plots for catalytic CO oxidation over catalyst LNCMO-16-600 under different WHSVs.                                                                                                                            | S24 |
| <b>Fig.S10</b> XRD patterns for the as-prepared and used catalysts of (a) LNCMO-16-600 and (b) LNCM-16-600                                                                                                                            | S25 |
| <b>Fig.S11</b> (a) TEM image at low magnification, (b) SAED image and (c) HRTEM image taken on used LNCMO-16-600 catalyst; (d) TEM image at low magnification, (e)SAED image and (f) HRTEM image taken on used LNCMO-16-600 catalyst. | S26 |
| <b>Fig.S12</b> TG-IR obtained at a heating rate of 10 °C/min in an air flow of 100 mL/min of used (a) LNCMO-16-600 and (b) LNCM-16-600 samples                                                                                        | S27 |
| <b>Fig.S13</b> SEM-EDS elemental mapping images taken on catalyst LNCMO-16-600.                                                                                                                                                       | S29 |
| <b>Fig.S14</b> The initial H <sub>2</sub> consumption rate as a function of inverse temperature over different catalysts.                                                                                                             | S30 |
| <b>Fig.S15</b> Dependence of reaction rate on partial pressure of O <sub>2</sub> over catalysts LNCMO-16-600, LNCM-16-600 and LNCMO-32-600.                                                                                           | S31 |
| <b>Fig.S16</b> XRD pattern of LNCM-SG-C and LNCM-SG-R.                                                                                                                                                                                | S33 |
| <b>Fig.S17</b> Process diagram of synthesizing (a) LNCMO-16-600 (b) LNCM-SG-R and (c) LNCM-SG-C                                                                                                                                       | S34 |

|                                                                                                                                                                                                                                             |     |
|---------------------------------------------------------------------------------------------------------------------------------------------------------------------------------------------------------------------------------------------|-----|
| <b>Table S1</b> Main Composition of NCM                                                                                                                                                                                                     | S35 |
| <b>Table S2</b> Texture properties of the investigated catalysts                                                                                                                                                                            | S36 |
| <b>Table S3</b> Surface composition of oxygen species derived from XPS analysis.                                                                                                                                                            | S37 |
| <b>Table S4</b> Catalytic CO oxidation performance over different catalysts.                                                                                                                                                                | S38 |
| <b>Table S5</b> The amount of O <sub>2</sub> released (μmol g <sup>-1</sup> ) from each oxygen species and the total O <sub>2</sub> released for catalysts LNCMO-16-600, LNCM-16-600 and LNCMO-32-600 measured through O <sub>2</sub> -TPD. | S39 |
| <b>Table S6</b> The amount of H <sub>2</sub> consumption for each peak (mmol g <sup>-1</sup> ) on LNCMO-16-600, LNCM-16-600 and LNCMO-32-600 catalysts.                                                                                     | S40 |
| <b>Table S7</b> Catalytic CO oxidation performance of the perovskite catalysts used in this study and reported in the literature                                                                                                            | S41 |
| <b>Table S8</b> Materials requirements (kg) to preparation 1 kg of perovskite oxides through different preparation technologies.                                                                                                            | S42 |
| <b>Table S9</b> Energy requirements (MJ) to preparation 1 kg of perovskite oxides through different preparation technologies.                                                                                                               | S43 |
| <b>Table S10</b> Manufacturing cost details for different production processes of perovskite oxides per year (1,000 tons of perovskite oxides )                                                                                             | S44 |
| <b>Table S11</b> Unit price and amount of co-products                                                                                                                                                                                       | S45 |
| <b>REFERENCES</b>                                                                                                                                                                                                                           | S46 |

## 1 EXPERIMENT SECTION

### 1.1 Catalyst preparation

#### 1.1.1 Preparation of LNCM-SG-R

The LNCM-SG-R catalyst was prepared by recycling NCM elements from LIBs via a conventional wet synthesis (sol-gel method). In particular, 1.2 g NCMO powder was first completely dissolved in 25 ml dilute nitric acid (2.5 mol /L) at 50 °C in a water bath. And then, 1.5 times of the stoichiometric molar amount of citric acid and same molar amount of  $\text{La}(\text{NO}_3)_3 \cdot 6\text{H}_2\text{O}$  (AR) as that of metals contained the dissolved solution were added into the nitric acid solution in the last step. After that, the mixture was stirred vigorously at 90 °C in water bath until most of the water was evaporated and then the mixture was dried at 120 °C oven overnight. At final, the mixture was calcined as follows: firstly, it was heated up to 260 °C at a rate of  $2\text{ °C} \cdot \text{min}^{-1}$  and kept at 200 °C for 120 min; secondly, it was heated up to 750 °C at a rate of  $2\text{ °C} \cdot \text{min}^{-1}$  and held at 750 °C for 300 min in air atmosphere.

#### 1.1.2 Preparation of LNCM-SG-C

The LNCM-SG-C catalyst was prepared from commercial chemicals by a conventional sol-gel method. Typically, 0.015 mol  $\text{Ni}(\text{NO}_3)_2 \cdot 6\text{H}_2\text{O}$ , 0.005 mol  $\text{Co}(\text{NO}_3)_2 \cdot 6\text{H}_2\text{O}$  and 0.005 mol  $\text{Mn}(\text{NO}_3)_2 \cdot 4\text{H}_2\text{O}$  and 0.025 mol  $\text{La}(\text{NO}_3)_3 \cdot 6\text{H}_2\text{O}$  were dissolved into 25 ml deionized water. Then, 0.0375 mol citric acid were added in the

solution. After that, the mixture was stirred vigorously at 90 °C in water bath until most of the water was evaporated and then the mixture was dried at 120 °C oven overnight. At final, the mixture was calcined as follows: firstly, it was heated up to 260 °C at a rate of 2 °C·min<sup>-1</sup> and kept at 200 °C for 120 min; secondly, it was heated up to 750 °C at a rate of 2 °C·min<sup>-1</sup> and held at 750 °C for 300 min in air atmosphere.

## 1.2 Material characterization

Inductively coupled plasma optical emission spectrometry (ICP-OES, Thermo Fisher Scientific ICAP PRO) was used to investigate the contents of Ni, Co, Mn, Li and Al elements in the NCM.

The phase and unit cell structures of the synthesized catalyst were analyzed by powder X-ray diffraction (XRD) technique. XRD analysis was carried out on an Rigaku Ultimate IV powder X-ray radiation diffractometer, Japan, equipped with Cu K $\alpha$  radiation = 1.5418 Å, with a scan rate of 2° min<sup>-1</sup>. The obtained XRD pattern was compared with a standard card to obtain the phase composition of the catalyst. Crystallite size of the products is calculated from the full width at half maximum of the XRD diffraction peaks at  $2\theta \approx 47^\circ$  for perovskites and  $43^\circ$  for NiO by using the Scherrer's equation:

$$D = \frac{k \cdot \lambda}{B \cdot \cos \theta} \quad (S1)$$

where D is the crystallite size,  $\lambda$  is the X-ray wavelength of 1.54 Å, B is the full width at half maximum of the diffraction line,  $\theta$  is the angle of diffraction, k is a constant (having the value 0.9 in our case).

The morphology and microstructure of the catalyst were directly observed by field emission environment scanning electron microscopy (SEM) produced by Hitachi, Japan (Regulus 8100) and transmission electron microscope (TEM) produced by Thermo Fisher Scientific, USA (Talos F200X).

The specific surface area of the catalyst was analyzed by N<sub>2</sub> adsorption-desorption, which was carried out on Micromeritics APSP 2460.

X-ray photoelectron spectroscopy (XPS) is mainly used to analyze the surface element composition, valence charge and species of the catalyst. The K-Alpha type XPS produced by Thermo Fisher Scientific of the USA uses Al K $\alpha$  ( $h\nu = 1486.6$  eV) as the excitation source and C 1s (284.8 eV) as the standard to calibrate the other elements.

The thermal analysis of the catalysts after 20-hour long-term stability test were studied using thermogravimetric-infrared (TG-IR) analysis. The experimental setup employed a simultaneous thermal analyzer (TA Instruments SDT 650) and Fourier-transform infrared (FTIR, Nicolet IS 20) spectrometer. The system combines thermal analysis with infrared spectroscopy of CO<sub>2</sub>. Thermal analysis of the used catalysts was conducted in an air flow of 100 ml min<sup>-1</sup> within a heating rate of 10 °C min<sup>-1</sup> in the temperature range of 100 - 850 °C. The preliminary measurement of the empty crucible was utilized as the background data. The absorption band at 2361 cm<sup>-1</sup> in FTIR spectra was employed for the analysis of CO<sub>2</sub>, throughout the temperature range of the thermal analysis.

Electron spin resonance (ESR) spectra were acquired on a Bruker ESR 5000 spectrometer (USA) operating in the X-band. To detect the presence and amount of oxygen vacancies on catalysts, the ESR measurement was carried out in high vacuum after the samples were pretreated in N<sub>2</sub> at 400 °C to remove surface adsorbed oxygen species.



The temperature-programmed desorption of O<sub>2</sub> temperature-programmed desorption (O<sub>2</sub>-TPD) and H<sub>2</sub> temperature-programmed reduction (H<sub>2</sub>-TPR) experiments over all samples were conducted in a AutoChem II 2920 (Micromeritics, USA). Before each of the experiments, the samples (100 mg) were pretreated in flowing He (50 mL/min) at 200 °C for 1 h, followed by cooling down to room temperature. For O<sub>2</sub>-TPD, the pretreated sample (100 mg) was exposed to 4% O<sub>2</sub>/He (50 mL/min) at room temperature for 30 min and then ramped (10 °C/min) up to 800 °C in He. For H<sub>2</sub>-TPR, the reduction of pretreated samples (100 mg) was carried out from room temperature to 800 °C in a flow of 10% H<sub>2</sub>/He (50 mL min<sup>-1</sup>) at the ramping of 10 °C min<sup>-1</sup>. The gas stream was monitored by a thermal conductivity detector (TCD).

The in situ diffuse reflectance infrared transform spectroscopy (DIRFITS) of CO oxidation was carried out using a Bruker INVENIO-S (German)spectrometer equipped with an MCT detector. Prior to the DIRFITS measurement, the samples were purged with N<sub>2</sub> at 370 °C (on the basis of O<sub>2</sub>-TPD results) for 30 min to remove surface-adsorbed oxygen species as much as possible. Then cooling to 200 °C for 30 min, the backgrounds were collected at 200 °C in a N<sub>2</sub> flow. Afterward, a flow of 1% CO/N<sub>2</sub>, 5% O<sub>2</sub>/N<sub>2</sub>, and 1% CO+5% O<sub>2</sub>/N<sub>2</sub> was successively fed onto the pretreated catalyst surface and held for 30 min at 200 °C, respectively. The spectra were collected simultaneously. All total gas flow is 50 mL/min.

### 1.3 Catalytic performance evaluation

The temperature-programmed oxidation of CO was employed to evaluate the activity of catalytic CO removal. A 0.4 g catalyst (0.3 – 0.45 mm) was put in a fixed-bed reactor with a 10 mm inner diameter quartz tube. The reactant gas was 1 vol% CO and 15 vol% O<sub>2</sub> carried by N<sub>2</sub>. The total flow gas was 200 ml min<sup>-1</sup> (30,000 ml g<sup>-1</sup>h<sup>-1</sup>). After the gas concentration was stable, the temperature was increased with the rate of 10 °C·min<sup>-1</sup>. The outlet gas was analyzed employing an infrared flue gas analyzer (MRU VARIO PLUS). CO conversion ( $X_{CO}$ , %) was defined as  $(C_i - C_o)/C_i \times 100\%$ , where  $C_i$  and  $C_o$  are CO concentration corresponding to the inlet and outlet, respectively. The catalytic activity was evaluated by the values of  $T_{50}$  and  $T_{90}$ , which were defined as the temperatures at 50% and 90% of CO conversion, respectively. In addition, the reaction rate ( $r_{norm}$ , mol s<sup>-1</sup>m<sup>-2</sup>) is derived from the following Eq. S2:

$$r_{norm} = \frac{C_i \cdot F \cdot X_{CO}}{m \cdot S_{BET}} \quad (S2)$$

Where  $F$  (mol h<sup>-1</sup>) is the gas flow rate, the  $m$  is the mass of catalyst,  $S_{BET}$  is measured by N<sub>2</sub> adsorption-desorption analysis.

The apparent activation energie of oxidation reaction ( $E_a$ , kJ mol<sup>-1</sup>) is calculated based on the Arrhenius equation, on the condition of  $X_{CO}$  lower than 10% to reduce the effect of mass transfer:

$$\ln(r) = \frac{E_a}{RT} - \ln(A) \quad (\text{S3})$$

## 1.4 Economic and environmental analysis

The EverBatt model<sup>1</sup>, developed by the Argonne National Laboratory, was employed to conduct a techno-economic and life-cycle assessment of recycling spent batteries. This comprehensive model is designed to evaluate the costs and environmental implications of battery recycling processes. In addition, our assessment has added necessary perovskite synthesis processes after recycling spent LIBs. The analysis focused on the total energy use, greenhouse gas (GHG) emissions, and economic value of the three synthesis methods<sup>2</sup>.

The synthesis process of LNCMO-16-600, which represents the process of solid-state recovery of lithium batteries to prepare perovskite, is shown in Figure S17a. spent LIBs are shredded, and then undergo a low temperature calcination process to burn off the binder and electrolyte, several physical separation processes to separate out aluminum, copper, steel as metal scraps and plastics, and a leaching process followed by hydrogen reduction, extraction and precipitation to produce lithium hydroxide, and Ni/Co/Mn compounds for perovskite production. The calcined Ni/Co/Mn compounds is milled and calcined after mixing with La source to form perovskite

During the traditional wet synthesis of LNCM-SG-R by recycling lithium batteries through hydrometallurgical methods (Figure S17b), the first step is the disassembly process. The cathode powders are separated after disassembling. Then, the metal oxides are leached into metal ions by using chemical reagents such as acid and alkali. Ni/Co/Mn metal salts,

obtained through alkaline precipitation, is used as precursor to synthesize perovskite via sol-gel method.

The typical sol-gel method is also used in the synthesis of LNCM-SG-C (Figure S17c), and the difference from LNCM-SG-R is that all raw materials are commercial chemicals.

#### 1.4.1 Evaluation of the life-cycle total energy consumption and GHG emissions

The three synthesis processes of perovskite oxides, featuring LNCMO-16-600, LNCM-SG-R, LNCM-SG-C respectively, are assumed to be based on processing 1,000 metric tons of perovskite catalysts per year in China. The modeling of the life-cycle total energy and GHG emissions was based on the materials and energy flows through the LIBs recycling and perovskite fabrication process, as discussed below.

**Materials input:** The materials requirements for the three recycling technologies are summarized in Table S8. The materials requirements for the spent LIBs recycling processes are obtained from EverBatt, and the materials requirements for the perovskite synthesis process are obtained based on our lab process. The life-cycle analysis accounts for the environmental impacts of all the materials consumed in the process by capturing the environmental impacts associated with their upstream production.

**Energy input:** To calculate the life-cycle environmental impacts attributable to all types of energy consumed in the process, the life-cycle analysis considers the environmental impacts associated with electricity generation, as well as those associated

with on-site fuel combustion (Table S9). The purchased energy consumptions for the spent LIBs recycling processes are obtained from EverBatt, while that for the perovskite synthesis process is estimated from calculations based on our lab process.

**Process emissions:** In the life-cycle analysis, we also accounted for environmental impacts associated with process emissions that are not due to fuel combustion. For the three synthesis processes, process emissions include those from material combustion and thermal decomposition.

#### 1.4.2 Cost and co-products revenue analysis

The specific cost parameters chosen for the industry manufacturing plant are summarized in Table S10. The co-products revenue calculation was based on the sales of recycled materials in LIBs recycling process. The prices are listed in Table S11.

## 2 SUPPORTING FIGURES AND TABLES

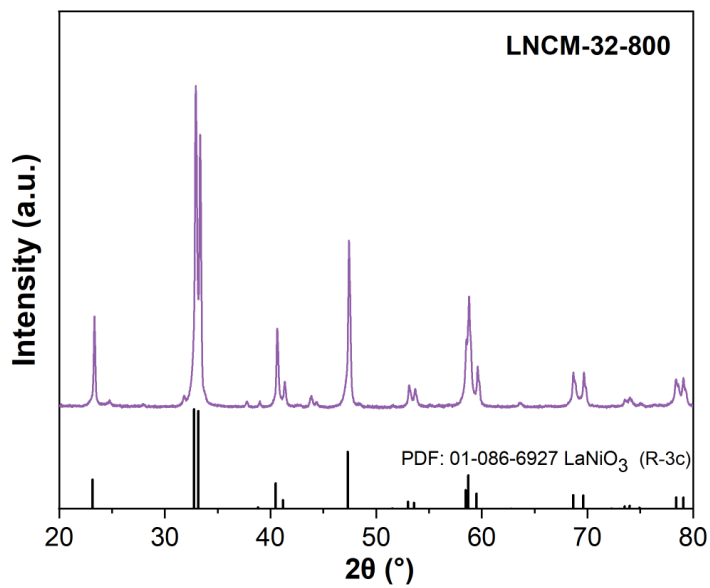

**Fig.S1** XRD pattern of LNCM-32-800

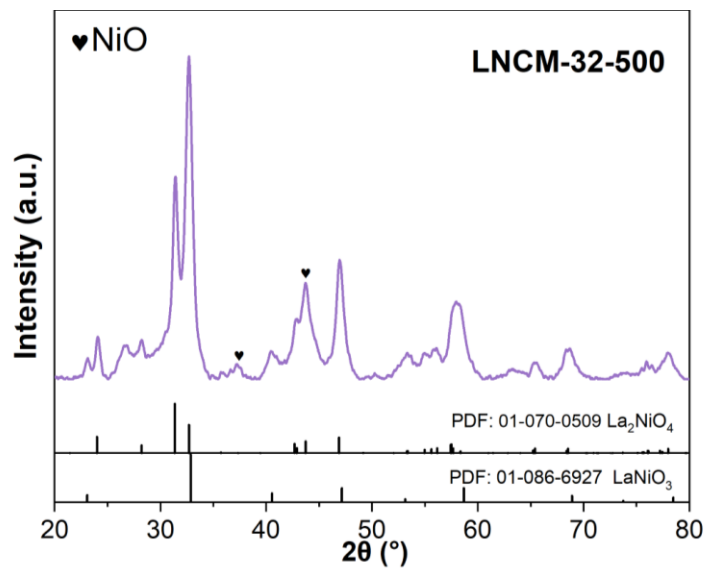

**Fig.S2** XRD pattern of LNCM-32-800



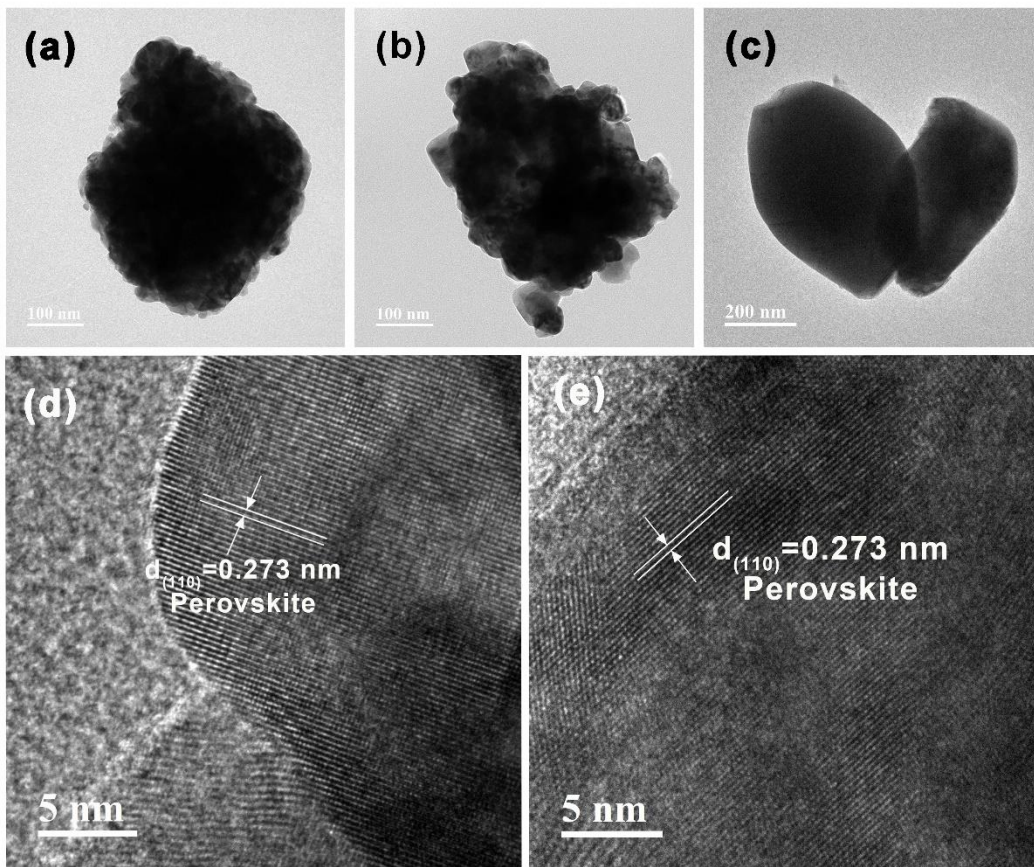

**Fig.S3** TEM images of (a) LNCM-16-600, (b) LNCM-16-800, (c) LNCM-16-1000, and HRTEM images of (d) LNCM-16-800, and (e) LNCM-16-1000.

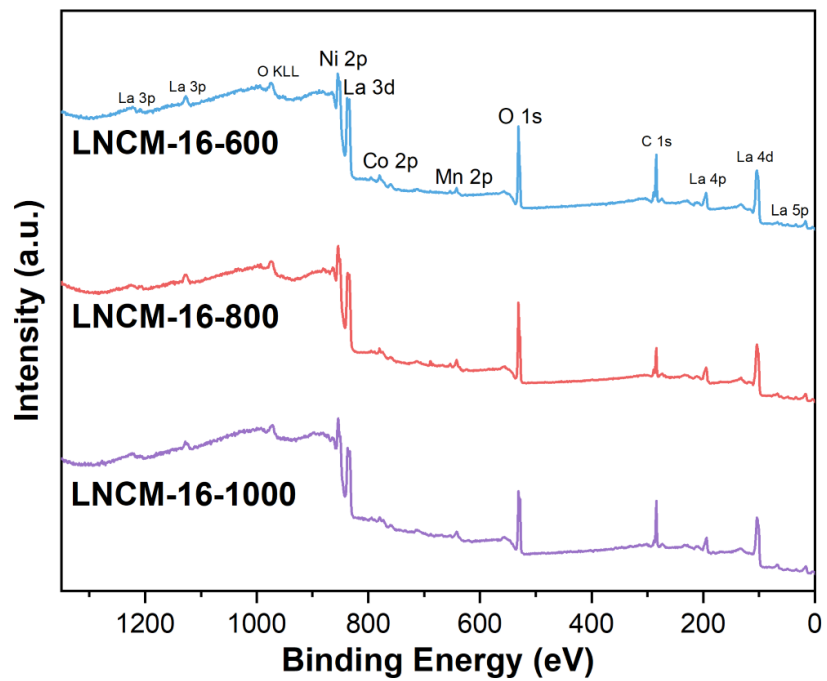

**Fig.S4** XPS survey over catalysts LNCM-16-600, LNCM-16-800 and LNCM-16-1000.

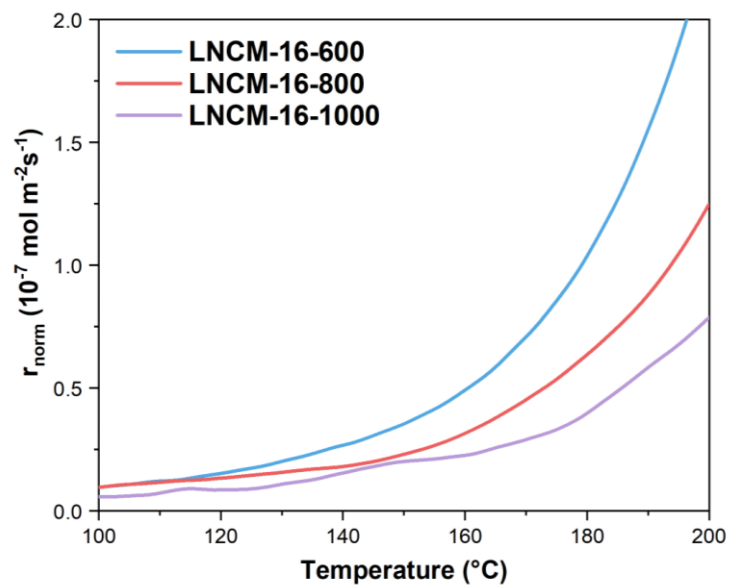

**Fig.S5** Normalized CO conversion rate ( $r_{\text{norm}}$ ) versus temperature over catalysts LNCM-16-600, LNCM-16-800 and LNCM-16-1000

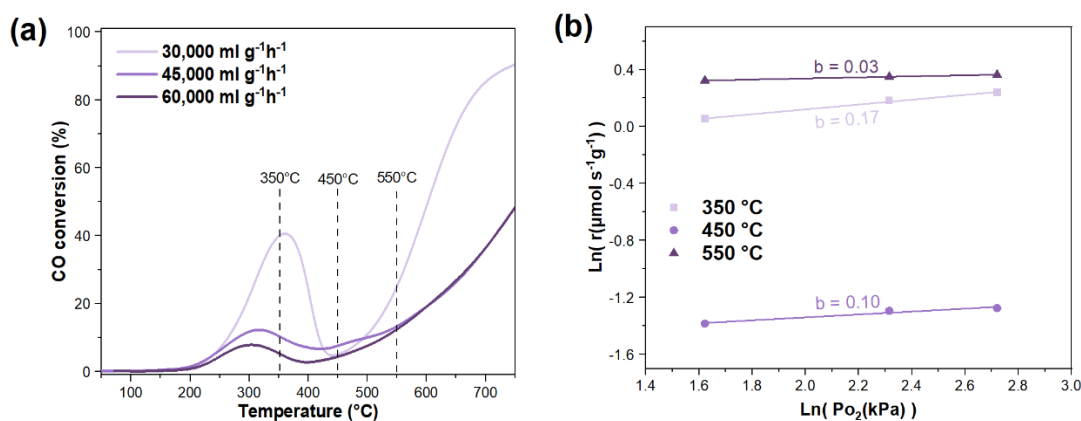

**Fig.S6** (a) Light-off curves during CO oxidation over catalyst LNCM-16-1000 under different WHSVs; (b) dependence of CO reaction rate on partial pressure of O<sub>2</sub> over catalyst LNCM-16-1000 catalyst (WHSV = 45,000 ml g<sup>-1</sup>h<sup>-1</sup>).

Fig.S6 (a) shows the light-off curves of the CO oxidation over LNCM-16-1000 under different WHSVs. The reaction condition is 1% CO, 15% O<sub>2</sub> and 84% N<sub>2</sub>. Although the CO conversion decreases with increases in WHSV from 30,000 to 60,000 ml g<sup>-1</sup>h<sup>-1</sup>, the CO conversion continues to decline with elevated temperatures (300 to 450 °C), indicating that mass transfer limitation is not the primary factor.

Another explanation is that the active sites involved in the catalytic reaction differ at different temperatures, leading to changes in catalytic performance. To verify the hypothesis, Fig. S6(b) shows how the rates of CO oxidation changed under different temperature (350, 450 and 550 °C) as a function of the partial pressure of O<sub>2</sub> demonstrating that different oxygen species play a significantly varied role in the catalytic reaction. The

order of the b values at the three temperatures is 350 °C (0.17) > 450 °C (0.10) > 550 °C (0.03), indicating that the CO oxidation mechanism over LNCM-16-1000 catalyst may gradually changes from the mixed mechanism of L-H and MvK at 350 °C to a typical MvK mechanism at 550 °C (for a more detailed explanation, please refer to the caption of Figure S13.). For LNCM-16-1000 catalyst, the L-H mechanism is impressed and MvK mechanism is not fully activated at 450 °C, which results in a decrease in CO conversion. A change in reaction mechanism is frequently attributed to a variation in the active sites.<sup>3</sup> Therefore, the active sites involved in the catalytic reaction differ at varying temperatures, is the most possible reason for the changes in catalytic performance.

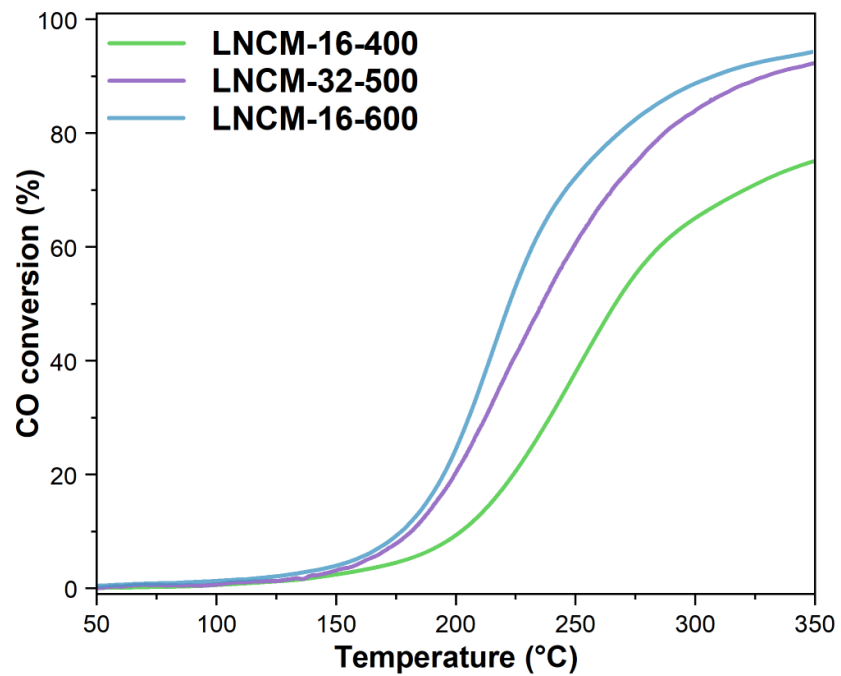

**Fig.S7** Light-off curves during CO oxidation over catalysts LNCM-16-400, LNCM-32-500 and LNCM-16-600.

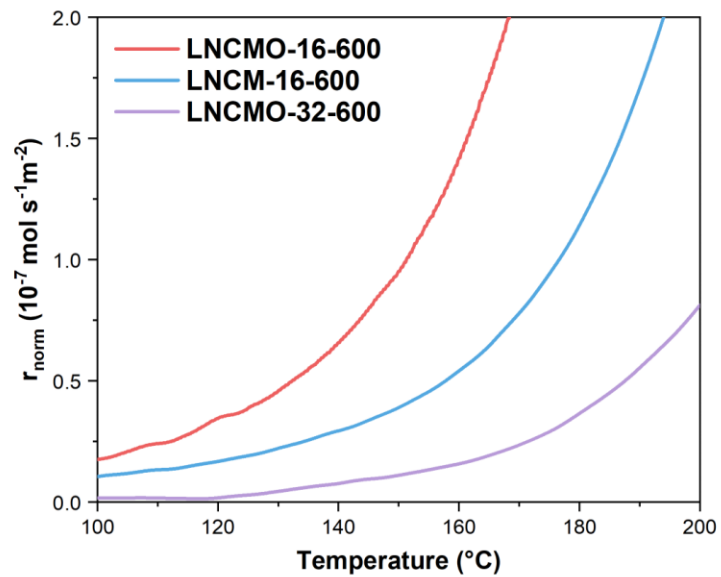

**Fig.S8** Normalized CO conversion rate ( $r_{\text{norm}}$ ) versus temperature over catalysts LNCMO-16-600, LNCM-16-600 and LNCMO-32-600.

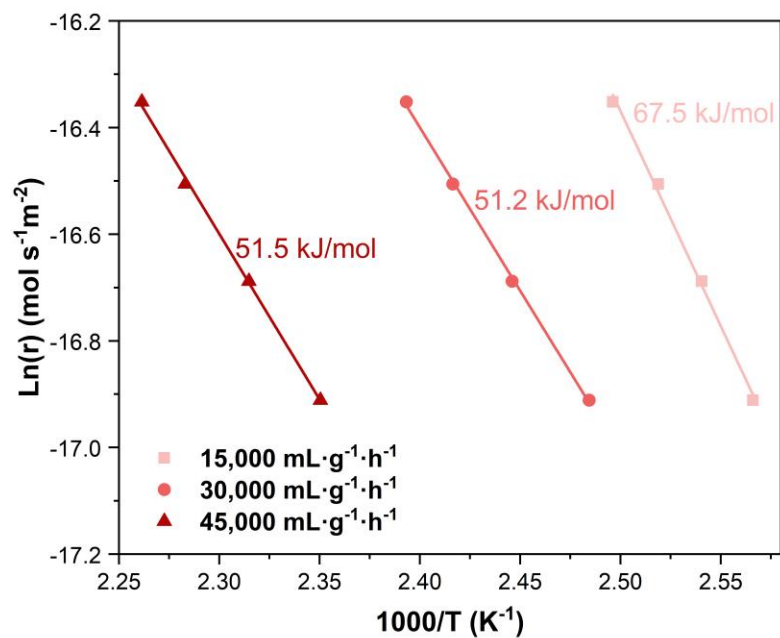

**Fig.S9** Arrhenius plots for catalytic CO oxidation over catalyst LNCMO-16-600 under different WHSVs.



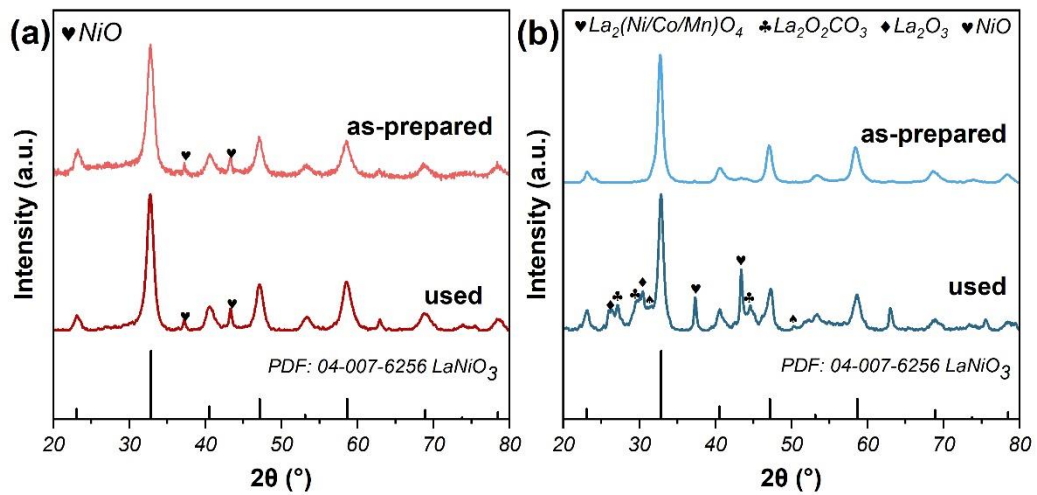

**Fig.S10** XRD patterns for the as-prepared and used catalysts of (a) LNCMO-16-600 and (b) LNCM-16-600

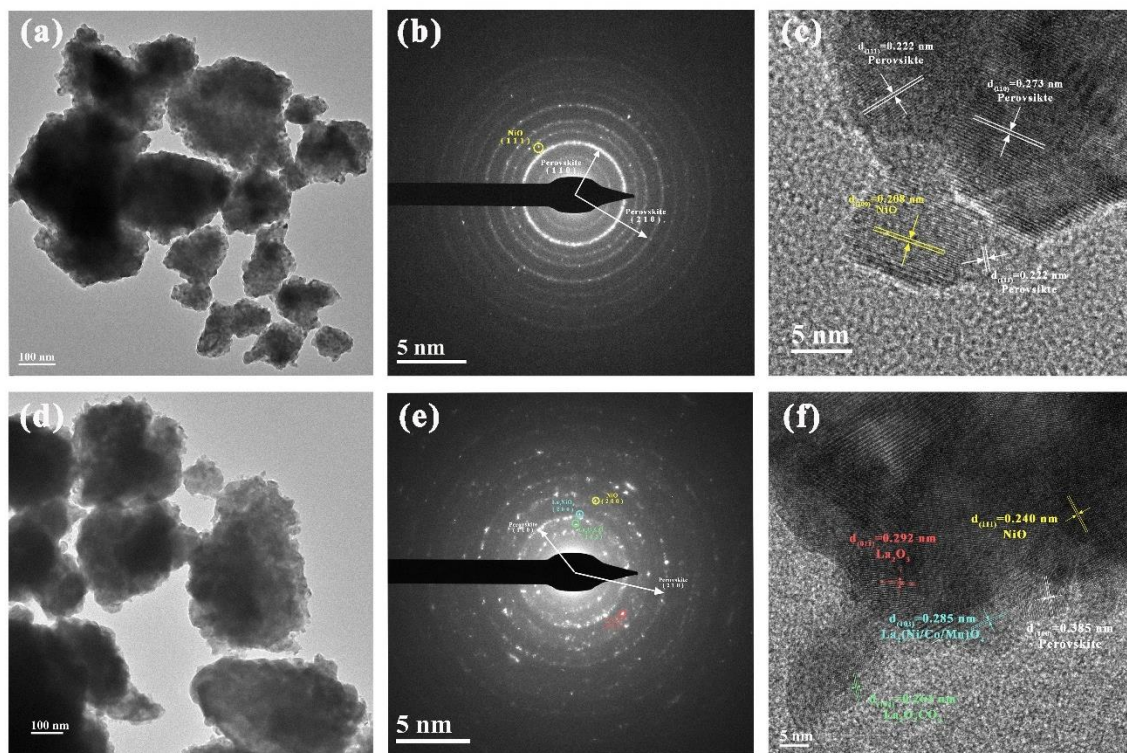

**Fig.S11** (a) TEM image at low magnification, (b) SAED image and (c) HRTEM image taken on used LNCMO-16-600 catalyst; (d) TEM image at low magnification, (e) SAED image and (f) HRTEM image taken on used LNCMO-16-600 catalyst.

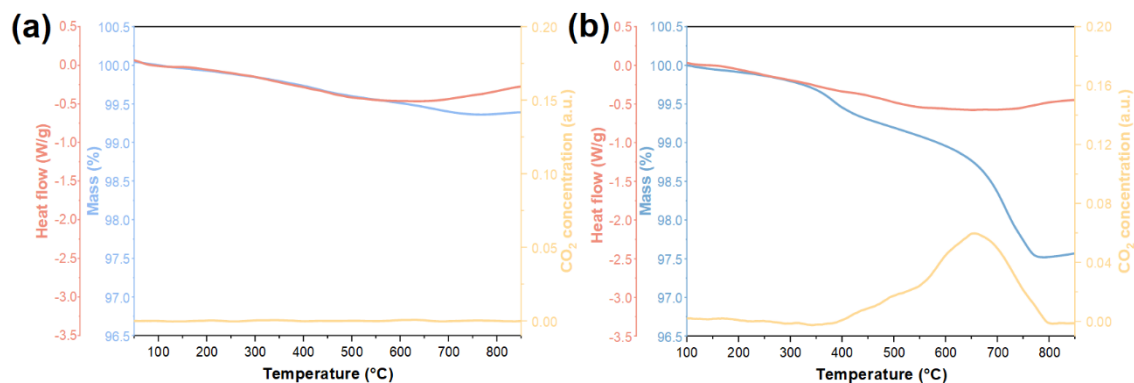

**Fig.S12** TG-IR obtained at a heating rate of 10 °C/min in an air flow of 100 mL/min of used (a) LNCMO-16-600 and (b) LNCM-16-600 samples

The TG-IR analysis results of the used LNCMO-16-600 and the used LNCM-16-600 are presented in Fig.S12(a) and (b), respectively. For used LNCMO-16-600, when temperature raise from 100 °C to 750 °C, the mass only slightly decreased from 100% to 99.3%. The negative value of heat flow in the temperature range of 100-850 °C indicate a heat-absorbing process. At temperatures exceeding 600 °C, the heat flow increases gradually with temperature. It may be due to a transformation in the perovskite structure which undergoes a shift from cubic (in the Pm-3m space group) to rhombohedral (in the R-3c space group), as previously discussed (Fig.2 (C)). The absence of significant CO<sub>2</sub> detection throughout heating process, indicates that neither carbon deposition nor carbonate accumulation occurred. In conjunction with the XRD (Fig.10(a)) and TEM (Fig.11(a)) results, it can be posited that LNCMO-16-600 catalyst remains unaltered during 20-hour test, exhibiting remarkable stability. For the LNCM-16-600 catalyst, a significant

decline in mass was observed following an increase in temperature to 400 °C, with a reduction to 97.6% at 760 °C. Furthermore, the production of CO<sub>2</sub> gas is also detected at temperatures exceeding 400 °C. The heat flow curve shows no exothermic peak, indicating that production of CO<sub>2</sub> is not due to the oxidation of carbon deposits. As evidenced by the XRD (Fig.10(b)) and TEM(Fig.11(b)) analysis, as well as in accordance with and literature,<sup>4</sup> the released CO<sub>2</sub> is derived from the decomposition of La<sub>2</sub>O<sub>2</sub>CO<sub>3</sub>. The LNCM-16-600 catalyst underwent perovskite structure decomposition and carbonate accumulation during the 20-hour stability test.

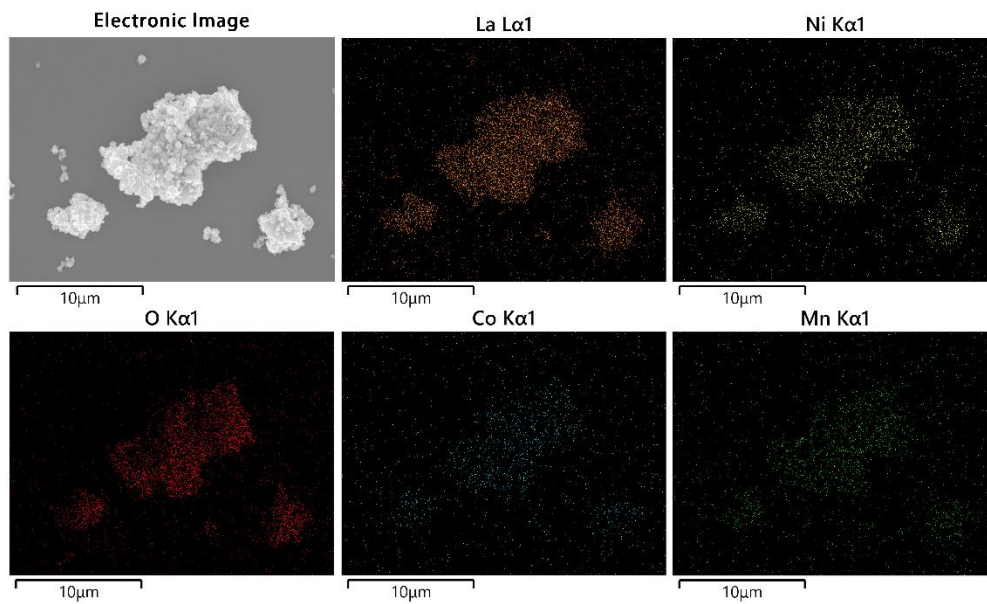

**Fig.S13** SEM-EDS elemental mapping images taken on catalyst LNCMO-16-600.

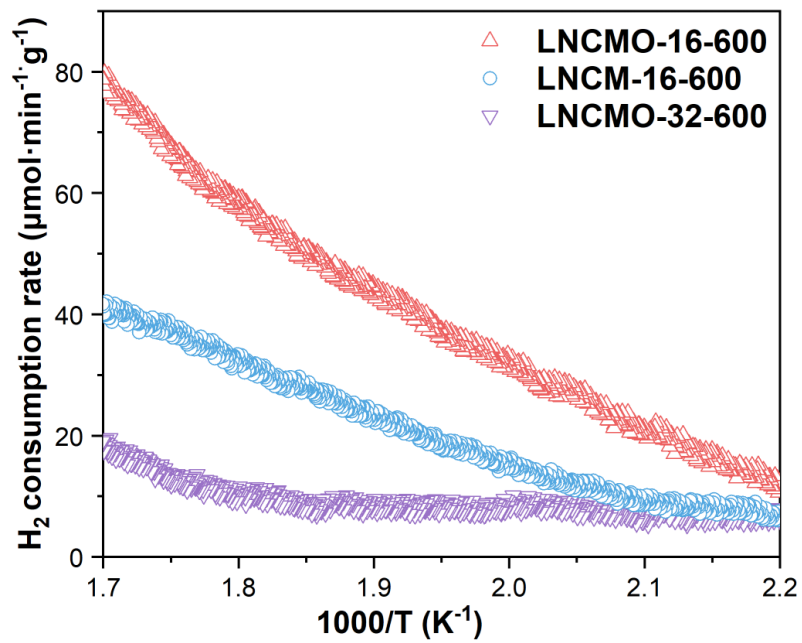

**Fig.S14** The initial H<sub>2</sub> consumption rate as a function of inverse temperature over different catalysts.

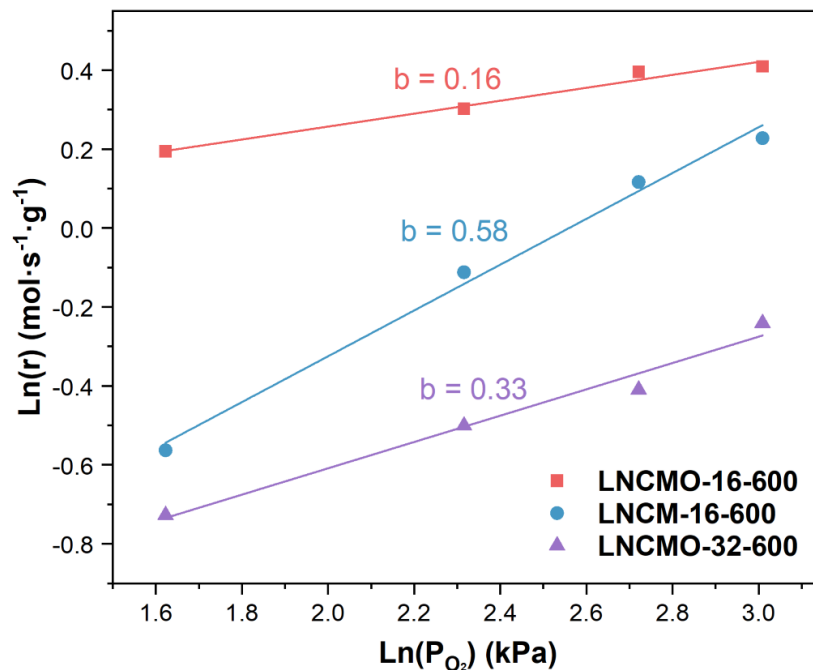

**Fig.S15** Dependence of reaction rate on partial pressure of O<sub>2</sub> over catalysts LNCMO-16-600, LNCM-16-600 and LNCMO-32-600.

The reaction rate be expressed as the equations below:

$$r = k P_{\text{CO}}^a P_{\text{O}_2}^b \quad (\text{S4})$$

$$\text{Ln}(r) = \text{Ln}(k) + a \text{Ln}(P_{\text{CO}}) + b \text{Ln}(P_{\text{O}_2}) \quad (\text{S5})$$

Where  $r$  is the reaction rate ( $\mu\text{mol g}^{-1}\text{s}^{-1}$ );  $k$  is the rate constant associated with  $E_a$ ;  $P_{\text{CO}}$  and  $P_{\text{O}_2}$  represent the partial pressures of CO and oxygen,  $a$  and  $b$  are the reaction orders. The experimental data of reaction rate is best fitted with Eq. S5. When  $b=0$ , the  $\text{O}_{\text{latt}}$  directly participate in the reaction instead of gas phase oxygen, and the reaction mainly follows the MvK mechanism; the bigger  $b$  value indicating that more gaseous oxygen directly

participates in CO oxidation, and the L-H mechanism plays a more important role in reaction.<sup>5,6</sup>



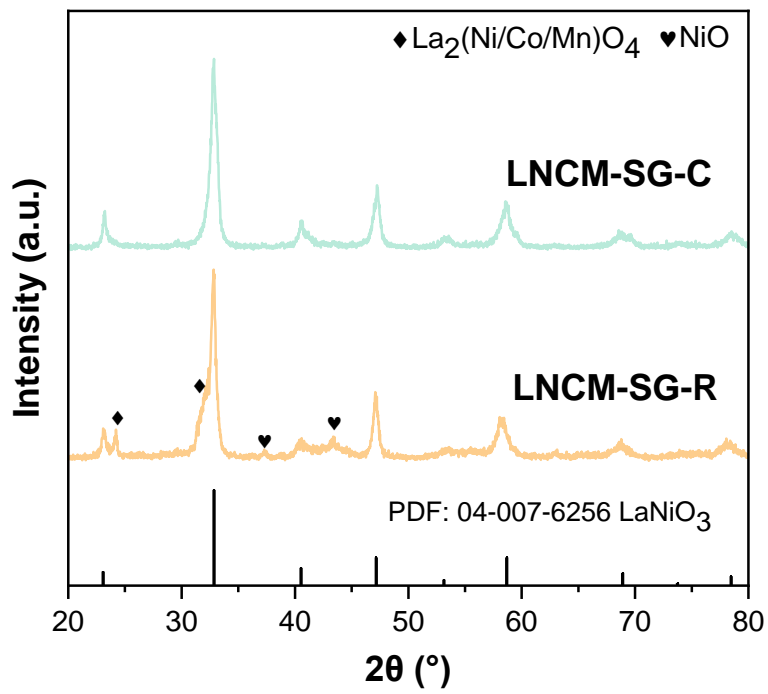

**Fig.S16** XRD pattern of LNCM-SG-C and LNCM-SG-R.

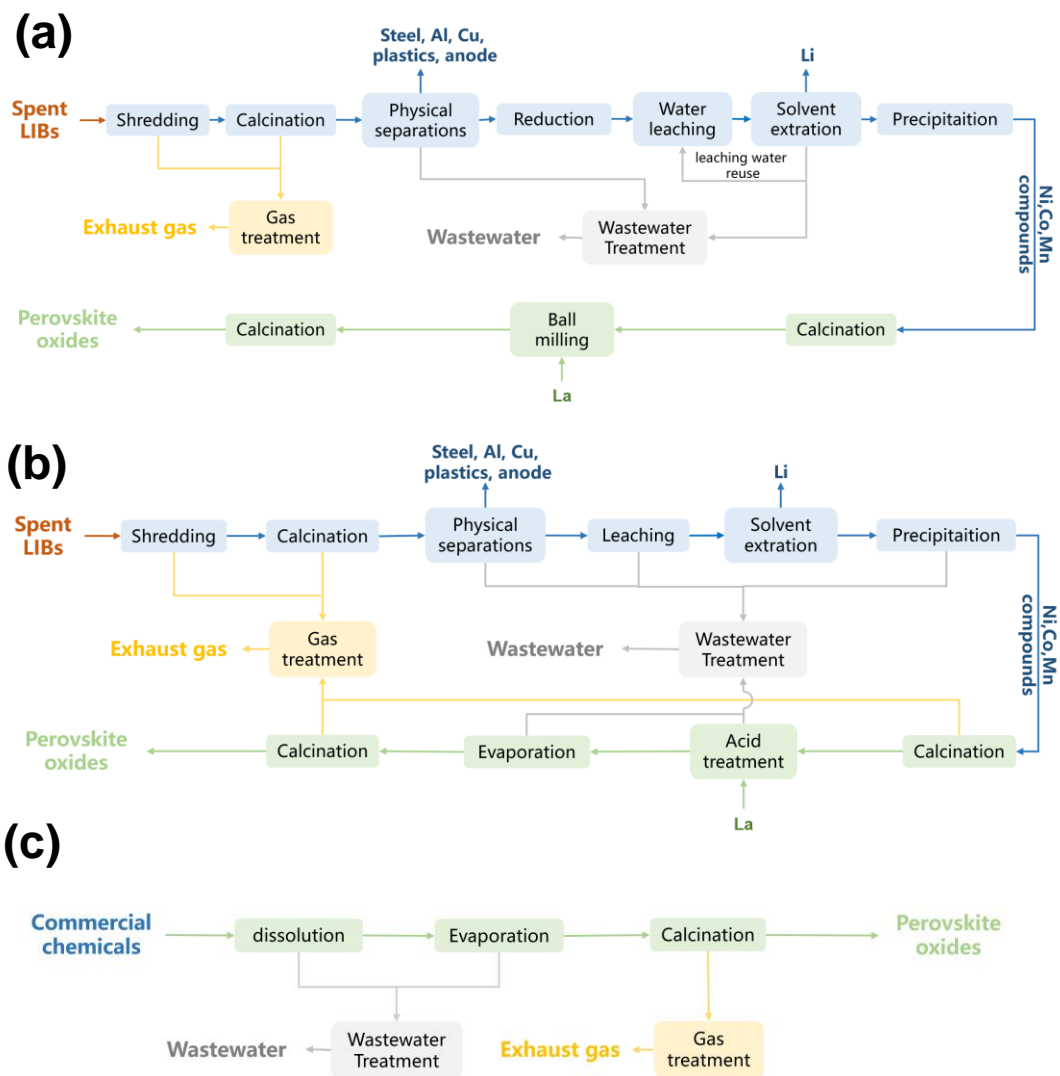

**Fig.S17** Process diagram of synthesizing (a) LNCMO-16-600 (b) LNCM-SG-R and (c) LNCM-SG-C

**Table S1** Main Composition of NCM

| Elements       | Ni    | Co    | Mn    | Li     | Al     |
|----------------|-------|-------|-------|--------|--------|
| Content (wt.%) | 57.70 | 19.53 | 18.04 | 0.7763 | 0.1073 |

**Table S2** Texture properties of the investigated catalysts

| Catalysts    | Crystal size (nm) <sup>a</sup> |      | Average particle size (nm) <sup>b</sup> | S <sub>BET</sub> (m <sup>2</sup> ·g <sup>-1</sup> ) <sup>c</sup> |
|--------------|--------------------------------|------|-----------------------------------------|------------------------------------------------------------------|
|              | Perovskite                     | NiO  |                                         |                                                                  |
| LNCM-16-600  | 9.8                            | -    | 29.5                                    | 4.28                                                             |
| LNCM-16-800  | 37.6                           | -    | 54.5                                    | 1.35                                                             |
| LNCM-16-1000 | 64.1                           | -    | 550                                     | 0.64                                                             |
| LNCMO-16-600 | 8.4                            | 19.6 | 27                                      | 3.29                                                             |
| LNCMO-32-600 | 10.7                           | -    | 35                                      | 2.67                                                             |

<sup>a</sup> The crystal size was calculated by Scherrer equation (Eq. S1).

<sup>b</sup> The average particle size was measured by SEM images.

<sup>c</sup> Specific surface area (S<sub>BET</sub>) was obtained by BET method.

**Table S3** Surface composition of oxygen species derived from XPS analysis.

| Catalysts    | O species (%)     |                   |                |                                     |
|--------------|-------------------|-------------------|----------------|-------------------------------------|
|              | O <sub>latt</sub> | O <sub>surf</sub> | O <sub>c</sub> | O <sub>ads</sub> /O <sub>latt</sub> |
| LNCM-16-600  | 24.9              | 68.2              | 6.9            | 2.74                                |
| LNCM-16-800  | 31.9              | 61.6              | 6.5            | 1.93                                |
| LNCM-16-1000 | 36.0              | 60.4              | 3.6            | 1.68                                |
| LNCMO-16-600 | 38.2              | 55.2              | 6.6            | 1.45                                |
| LNCMO-32-600 | 27.4              | 68.0              | 4.6            | 2.48                                |

**Table S4** Catalytic CO oxidation performance over different catalysts.

| Catalysts    | Catalytic CO oxidation performance |                      |
|--------------|------------------------------------|----------------------|
|              | T <sub>50</sub> (°C)               | T <sub>90</sub> (°C) |
| LNCM-16-600  | 223                                | 309                  |
| LNCM-16-800  | 446                                | 568                  |
| LNCM-16-1000 | 604                                | 747                  |
| LNCMO-16-600 | 192                                | 230                  |
| LNCMO-32-600 | 262                                | 294                  |
| LNCM-SG-R    | 211                                | 234                  |
| LNCM-SG-C    | 237                                | 266                  |

**Table S5** The amount of O<sub>2</sub> released (μmol g<sup>-1</sup>) from each oxygen species and the total O<sub>2</sub> released for catalysts LNCMO-16-600, LNCM-16-600 and LNCMO-32-600 measured through O<sub>2</sub>-TPD.

| Catalysts    | Physiosorbed O <sub>2</sub> | O <sub>ads</sub> | Surface O <sub>latt</sub> | Bulk O <sub>latt</sub> | Total O <sub>2</sub> Released |
|--------------|-----------------------------|------------------|---------------------------|------------------------|-------------------------------|
| LNCMO-16-600 | 6.1                         | 81.1             | 97.2                      | 94.5                   | 278.9                         |
| LNCM-16-600  | 8.3                         | 83.0             | 56.1                      | 55.6                   | 203.0                         |
| LNCMO-32-600 | 5.4                         | 58.8             | 53.6                      | 57.3                   | 175.1                         |

**Table S6** The amount of H<sub>2</sub> consumption for each peak (mmol g<sup>-1</sup>) on LNCMO-16-600, LNCM-16-600 and LNCMO-32-600 catalysts.

| Catalysts    | Peak A | Peak B | Peak C |
|--------------|--------|--------|--------|
| LNCMO-16-600 | 0.84   | 3.57   | 3.05   |
| LNCM-16-600  | 0.42   | 2.57   | 2.45   |
| LNCMO-32-600 | 0.30   | 3.57   | 2.03   |

The H<sub>2</sub> consumption peaks < 400 °C, 400-500 °C and > 500 °C is assigned to Peak A, Peak B and Peak C, respectively.



**Table S7** Catalytic CO oxidation performance of the perovskite catalysts used in this study and reported in the literature

| Catalysts                                                              | Preparation method    | Reaction condition                                                                                        | T <sub>50</sub><br>°C | T <sub>90</sub><br>°C | E <sub>a</sub><br>kJ/mol | Ref.      |
|------------------------------------------------------------------------|-----------------------|-----------------------------------------------------------------------------------------------------------|-----------------------|-----------------------|--------------------------|-----------|
| LaNi <sub>0.6</sub> Co <sub>0.2</sub> Mn <sub>0.2</sub> O <sub>3</sub> | Solid-state           | 1% CO + 15% O <sub>2</sub> + N <sub>2</sub> balance;<br>GHSV = 30,000 mL g <sup>-1</sup> h <sup>-1</sup>  | 192                   | 230                   | 51.2                     | This work |
| LaNi <sub>0.6</sub> Co <sub>0.2</sub> Mn <sub>0.2</sub> O <sub>3</sub> | Solid-state           | 1% CO + 15% O <sub>2</sub> + N <sub>2</sub> balance;<br>GHSV = 15,000 mL g <sup>-1</sup> h <sup>-1</sup>  | 162                   | 197                   | 67.5                     | This work |
| La <sub>0.9</sub> Ce <sub>0.05</sub> CoO <sub>3</sub>                  | Electrospinning       | 1% CO + 20% O <sub>2</sub> + Ar balance;<br>GHSV = 60,000 mL g <sup>-1</sup> h <sup>-1</sup>              | -                     | 202                   | 92.9                     | 7         |
| La <sub>0.3</sub> Sr <sub>0.7</sub> CoO <sub>3-δ</sub>                 | Sol-gel               | 1% CO + 20% O <sub>2</sub> + Ar balance;<br>GHSV = 30,000 mL g <sup>-1</sup> h <sup>-1</sup>              | 120                   | -                     | 59.4                     | 8         |
| Pr <sub>0.9775</sub> Ag <sub>0.0225</sub> MnO <sub>3+δ</sub>           | Citrate-method        | 0.5% CO + 5% O <sub>2</sub> + He balance;<br>WHSV=60,000 mL g <sup>-1</sup> h <sup>-1</sup>               | 146                   | 225                   | 64.3                     | 9         |
| La <sub>0.9</sub> Sr <sub>0.1</sub> CoO <sub>3</sub>                   | Templating method     | 0.4% CO + 10% O <sub>2</sub> + N <sub>2</sub> balance;<br>WHSV=240,000 mL g <sup>-1</sup> h <sup>-1</sup> | 146                   | 186                   | 63.6                     | 10        |
| SrTi <sub>0.9</sub> Co <sub>0.1</sub> O <sub>3-δ</sub>                 | Solid-state           | 2% CO+10% O <sub>2</sub> + N <sub>2</sub> balance;<br>WHSV=96,000 mL g <sup>-1</sup> h <sup>-1</sup>      | 278                   | 294                   | 70.9                     | 11        |
| La <sub>0.4</sub> Sr <sub>0.6</sub> CoO <sub>3-δ</sub>                 | Sol-gel               | 1% CO+20% O <sub>2</sub> + Ar balance;<br>WHSV=60,000 mL g <sup>-1</sup> h <sup>-1</sup>                  | -                     | 81                    | 46.6                     | 12        |
| CuO/SrTiO <sub>3</sub>                                                 | Flame spray pyrolysis | 2% CO+5% O <sub>2</sub> + N <sub>2</sub> balance;<br>WHSV=60,000 mL g <sup>-1</sup> h <sup>-1</sup>       | 127                   | 144                   | 159.33                   | 13        |
| LaMnO <sub>3</sub>                                                     | Templating method     | 0.2% CO+10% O <sub>2</sub> + N <sub>2</sub> balance;<br>WHSV=60,000 mL g <sup>-1</sup> h <sup>-1</sup>    | -                     | 237                   | 50.5                     | 14        |

**Table S8** Materials requirements (kg) to preparation 1 kg of perovskite oxides through different preparation technologies.

| Chemical                | Unit Cost (\$/kg) | Materials requirements (kg/kg <sub>cat</sub> ) |           |           |
|-------------------------|-------------------|------------------------------------------------|-----------|-----------|
|                         |                   | LNCMO-16-600                                   | LNCM-SG-C | LNCM-SG-R |
| Spent Battery (NCM 622) | 0                 | 1.157                                          | -         | 1.102     |
| Ammonium Hydroxide      | 0.46              | -                                              | -         | 0.039     |
| Hydrochloric Acid       | 0.15              | -                                              | -         | 0.015     |
| Hydrogen Peroxide       | 0.74              | -                                              | -         | 0.046     |
| Hydrogen                | 4.25              | 0.044                                          | -         | -         |
| Sodium Hydroxide        | 0.4               | -                                              | -         | 0.699     |
| Sulfuric Acid           | 0.06              | -                                              | -         | 1.350     |
| Soda Ash                | 0.15              | -                                              | -         | 0.025     |
| Citric Acid             | 0.69              | -                                              | 0.782     | 0.782     |
| Nitric Acid             | 0.24              | -                                              | 1.432     | 1.470     |
| Water                   | 0.00038           | 1.155                                          | 6.030     | 8.010     |
| Lanthanum Oxide         | 0.55              | 0.708                                          | 0.699     | 0.070     |
| Cobalt Oxide            | 37.66             | -                                              | 0.060     | -         |
| Magnesium Oxide         | 2.22              | -                                              | 0.058     | -         |
| Nickel sulfate          | 3.85              | -                                              | 0.381     | -         |

**Table S9** Energy requirements (MJ) to preparation 1 kg of perovskite oxides through different preparation technologies.

|             | Unit Cost<br>(\$/MJ) | Energy requirements (MJ/kg <sub>cat</sub> ) |           |           |
|-------------|----------------------|---------------------------------------------|-----------|-----------|
|             |                      | LNCMO-16-600                                | LNCM-SG-C | LNCM-SG-R |
| Diesel      | 0.0208               | 0.7                                         | -         | 0.7       |
| Natural gas | 0.0102               | 2.9                                         | -         | 2.9       |
| Electricity | 0.0191               | 138.8                                       | 59.4      | 79.5      |

**Table S10** Manufacturing cost details for different production processes of perovskite oxides per year (1,000 tons of perovskite oxides)

|                                       | LNCMO-16-600 | LNCM-SG-C    | LNCM-SG-R    |
|---------------------------------------|--------------|--------------|--------------|
| <b>I. Manufacturing Cost, \$/year</b> | \$15,405,127 | \$21,528,365 | \$22,218,618 |
| A. Direct product costs               | \$6,367,523  | \$10,215,994 | \$8,931,276  |
| Raw materials                         | \$629,270    | \$5,261,185  | \$2,843,633  |
| Operating labor                       | \$1,065,768  | \$1,319,365  | \$1,612,914  |
| Direct supervisory and clerical labor | \$159,865    | \$197,905    | \$241,937    |
| Utilities                             | \$2,635,422  | \$1,122,587  | \$1,561,378  |
| Maintenance and repairs               | \$1,384,453  | \$1,682,191  | \$1,958,539  |
| Operating supplies                    | \$207,668    | \$252,329    | \$293,781    |
| Laboratory charges                    | \$106,577    | \$131,937    | \$161,291    |
| Patents and royalties                 | \$178,500    | \$248,496    | \$257,803    |
| B. Fixed charges                      | \$7,438,953  | \$9,333,323  | \$10,867,970 |
| Depreciation                          | \$2,612,175  | \$3,298,414  | \$3,840,272  |
| Local taxes                           | \$1,107,562  | \$1,345,753  | \$1,566,831  |
| Insurance                             | \$166,134    | \$201,863    | \$235,025    |
| Rent                                  | \$15,673     | \$20,582     | \$25,346     |
| Financing (interest)                  | \$3,537,408  | \$4,466,712  | \$5,200,497  |
| C. Plant overhead costs               | \$1,598,651  | \$1,979,048  | \$2,419,371  |
| <b>II. General Expenses, \$/year</b>  | \$2,443,095  | \$3,327,169  | \$3,561,640  |
| A. Administrative costs               | \$479,595    | \$593,714    | \$725,811    |
| B. Distribution and selling costs     | \$1,071,000  | \$1,490,975  | \$1,546,816  |
| C. R&D costs                          | \$892,500    | \$1,242,479  | \$1,289,013  |
| <b>Total Product Cost, \$/year</b>    | \$17,848,223 | \$24,849,583 | \$25,780,262 |

**Table S11** Unit price and amount of co-products

| Chemical          | Unit Price (\$/kg) | Amount of co-product (kg/kg <sub>cat</sub> ) |           |           |
|-------------------|--------------------|----------------------------------------------|-----------|-----------|
|                   |                    | LNCMO-16-600                                 | LNCM-SG-C | LNCM-SG-R |
| Graphite          | 0.28               | 0.208                                        | -         | 0.208     |
| Aluminum          | 1.3                | 0.833                                        | -         | 0.833     |
| Copper            | 6.6                | 0.159                                        | -         | 0.159     |
| Lithium Hydroxide | 15.8               | 0.102                                        | -         | -         |
| Lithium Carbonate | 12.3               | -                                            | -         | 0.132     |

## REFERENCES

- 1.J. S. Qiang Dai, Shabbir Ahmed, Linda Gaines, Jarod C. Kelly, Michael Wang *EverBatt: A Closed-loop Battery Recycling Cost and Environmental Impacts Model*, Argonne National Laboratory 2019.
- 2.P. Xu, Q. Dai, H. Gao, H. Liu, M. Zhang, M. Li, Y. Chen, K. An, Y. S. Meng, P. Liu, Y. Li, J. S. Spangenberg, L. Gaines, J. Lu and Z. Chen, *Joule*, 2020, **4**, 2609-2626.
- 3.A. Liu, X. Liu, L. Liu, Y. Pu, K. Guo, W. Tan, S. Gao, Y. Luo, S. Yu, R. Si, B. Shan, F. Gao and L. Dong, *ACS Catal.*, 2019, **9**, 7759-7768.
- 4.Y. Dai, M. Xu, Q. Wang, R. Huang, Y. Jin, B. Bian, C. Tumurbaatar, B. Ishtsog, T. Bold and Y. Yang, *Appl. Catal., B*, 2020, **277**, 119271.
- 5.R. Kang, X. Wei, F. Bin, Z. Wang, Q. Hao and B. Dou, *Appl. Catal., A*, 2018, **565**, 46-58.
- 6.A.-P. Jia, G.-S. Hu, L. Meng, Y.-L. Xie, J.-Q. Lu and M.-F. Luo, *J. Catal.*, 2012, **289**, 199-209.
- 7.S. Liu, W. Zhang, T. Deng, D. Wang, X. Wang, X. Zhang, C. Zhang and W. Zheng, *ChemCatChem*, 2017, **9**, 3102-3106.
- 8.X. Wang, K. Huang, J. Qian, Y. Cong, C. Ge and S. Feng, *Science Bulletin*, 2017, **62**, 658-664.
- 9.S. K. Megarajan, S. Rayalu, M. Nishibori, Y. Teraoka and N. Labhsetwar, *ACS Catal.*, 2015, **5**, 301-309.
- 10.P. Li, X. Chen, Y. Li and J. W. Schwank, *Catal. Today*, 2021, **364**, 7-15.
- 11.J. Cho, M. Kim, K. T. Park, C. H. Rhee, H. W. Park, B. Koo and J. C. Jung, *Mol. Catal.*, 2023, **550**, 113536.
- 12.J. Yang, S. Hu, Y. Fang, S. Hoang, L. Li, W. Yang, Z. Liang, J. Wu, J. Hu, W. Xiao, C. Pan, Z. Luo, J. Ding, L. Zhang and Y. Guo, *ACS Catal.*, 2019, **9**, 9751-9763.

13.X. Yuan, L. Meng, Z. Xu, C. Zheng and H. Zhao, *Environ. Sci. Technol.*, 2021, **55**, 14080-14086.

14.W. Si, Y. Wang, Y. Peng and J. Li, *Angew. Chem. Int. Edit.*, 2015, **54**, 7954-7957.
